# Supplementary material for: Cannabidiol-Loaded Extracellular Vesicles from Human Umbilical Cord Mesenchymal Stem Cells Alleviate Paclitaxel-Induced Peripheral Neuropathy
Source: MDPI journal article supplement (doi:10.3390/pharmaceutics15020554), 2023-02-07

## **Cannabidiol Loaded Extracellular Vesicles from Human Umbilical Cord Mesenchymal Stem Cells Alleviate Paclitaxel Induced Peripheral Neuropathy**

Anil Kumar Kalvala<sup>a</sup>, Peggy Arthur<sup>a</sup>, Arvind Badge<sup>a</sup>, Tanmay Kulkarni<sup>b</sup>, Santanu Bhattacharya<sup>bc</sup>, Sunil Surapaneni<sup>a</sup>, Nil Kumar Patel<sup>a</sup>, Nimma Ramesh<sup>a</sup>, Aragaw Gebeyehu<sup>a</sup>, Nagavendra Kommineni<sup>a</sup>, David G Meckes Jr<sup>d</sup>, Li Sun<sup>d</sup>, Bipika Banjara<sup>a</sup>, Keb Mosley<sup>a</sup>, Thanh Cong Dinh<sup>a</sup>, Mandip Singh<sup>a@</sup>

a.College of Pharmacy and Pharmaceutical Sciences, Florida A&M University, Tallahassee, Florida, 32307, USA.

b.Department of Biochemistry and Molecular Biology, Mayo College of Medicine and Science, Jacksonville, FL, USA.

c.Department of Physiology and Biomedical Engineering, Mayo College of Medicine and Science, Jacksonville, FL, USA.

d. Department of Biomedical Sciences, Florida State University College of Medicine, 1115 West Call Street, Tallahassee, FL, 32306-4300, USA

**Abbreviated Title:** Role of CBD (MSC)-derived EVs formulation in experimental Paclitaxel Induced Neuropathy

**Funding source:** Consortium for Medical Marijuana Clinical Outcomes Research, Grant/Award number: SUB00002097, **National Institute on Minority Health and Health Disparities of National Institutes of Health**, Grant/Award Number: U54 MD007582 and NSF-CREST Center for Complex Materials Design for Multidimensional Additive Processing (CoManD), Grant/Award Number:1735968

### **@Correspondence**

Mandip Singh, Professor and Section Leader, Pharmaceutics,  
College of Pharmacy and Pharmaceutical Sciences,  
Florida A&M University  
Tallahassee, FL 32307  
Phone: 850-561-2790, Fax:850-599-3813  
E-mail: [mandip.sachdeva@famu.edu](mailto:mandip.sachdeva@famu.edu), [mandip.sachdeva@gmail.com](mailto:mandip.sachdeva@gmail.com)

## 1. Supplementary methods

### 1.1 Chemicals and antibodies:

Table S1: materials used in the present study with the source and catalog number

| Sr. No | Chemical name                                               | Key source                                                         | CAT#Number |
|--------|-------------------------------------------------------------|--------------------------------------------------------------------|------------|
| 1      | Cannabidiol (GLP and GMP grade)                             | Purisys™ (Athens, GA)                                              | NQS1951    |
| 2      | Paclitaxel                                                  | LC Laboratories (MA, USA)                                          | P-9600     |
| 3      | $\alpha$ -MEM media                                         | Millipore Sigma (St. Louis, MO)                                    | M4526      |
| 4      | Fetal bovine serum (FBS)                                    | Atlanta biological, MN, USA                                        | S11150     |
| 5      | Human umbilical cord derived mesenchymal stem/stromal cells | Dr. David Meckes, FSU College of Medicine Florida State University |            |
| 6      | PBS-vertical wheel bioreactor                               | PBS Biotech, Inc (Camarillo, CA).                                  | 200051BLEM |
| 7      | Cytodex-1 microcarrier                                      | VWR International (Radnor, PA),                                    | 17-0448-03 |
| 8      | NADH Assay Kit                                              | Millipore Sigma (St. Louis, MO)                                    | MAK037     |
| 9      | ATP Assay Kit                                               | Millipore Sigma (St. Louis, MO)                                    | MAK190     |
| 10     | P-AMPK alpha antibody                                       | Cell signalling technology, USA                                    | 2535S      |
| 11     | Sirt1 antibody                                              | Cell signalling technology, USA                                    | 9475S      |
| 12     | NRF2 antibody                                               | Cell signalling technology, USA                                    | 12721S     |
| 13     | NRF1 antibody                                               | Cell signalling technology, USA                                    | 46743S     |
| 14     | TFAM antibody                                               | Santacruz biotechnologies, CA                                      | 166965     |
| 15     | PINK 1 antibody                                             | Santacruz biotechnologies, CA                                      | 517353     |
| 16     | HO-1 antibody                                               | Cell signalling technology, USA                                    | 43966S     |
| 17     | SOD2 antibody                                               | Cell signalling technology, USA                                    | 13141S     |

|    |                               |                                 |        |
|----|-------------------------------|---------------------------------|--------|
| 18 | Catalase antibody             | Santacruz biotechnologies, CA   | 271803 |
| 19 | CB1 antibody                  | Santacruz biotechnologies, CA   | J1920  |
| 20 | 5HT1A antibody                | Abcam, MA, USA                  | 85615  |
| 21 | $\beta$ -Actin antibody       | Cell signalling technology, USA | 4970S  |
| 22 | Parkin Antibody               | Santacruz biotechnologies, CA   | 32282  |
| 23 | SIRT3 antibody                | Santacruz biotechnologies, CA   | 365175 |
| 24 | Mouse anti-rabbit IgG-CFL 488 | Santacruz biotechnologies, CA   | 516248 |
| 25 | Rabbit anti-mouse IgG-PE      | Santacruz biotechnologies, CA   | 358926 |
| 26 | Flotillin-2                   | Santacruz biotechnologies, CA   | 28320  |
| 27 | CD 63                         | Santacruz biotechnologies, CA   | 365604 |
| 28 | CD81                          | Santacruz biotechnologies, CA   | 166029 |
| 29 | Alix                          | Santacruz biotechnologies, CA   | 53538  |
| 30 | Calnexin                      | Santacruz biotechnologies, CA   | 23954  |

**Figure S1. Effect of CBD and CBD-EVs on neuritogenesis in cultured DRG cells isolated from L1 to L5 spinal region of Rats.** (a) Representative photomicrographs captured by using phase contrast microscope (40X) showing the neurite extensions coming out from each DRG cell, (b) bar graphs represents the percent of cells bearing neurites and (c) bar graph represent the image j analysis of neurite length of untreated and treated groups. \*\*\* $p < 0.001$  Vs NC, ^ $p < 0.05$ , ^^ $p < 0.01$  and ^^ $p < 0.001$  Vs PTX (8 mg/kg), \$ $P < 0.05$  and \$\$ $P < 0.01$  Vs PTX+CBD.

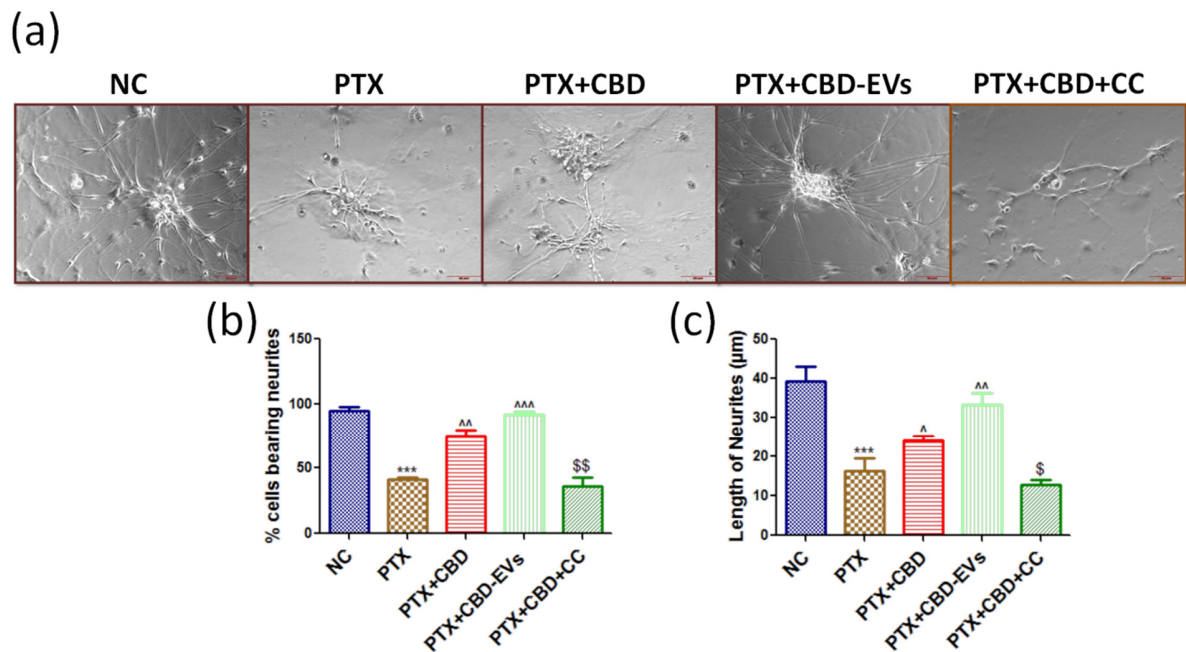

**Figure S2: Raw blots of all the markers:**

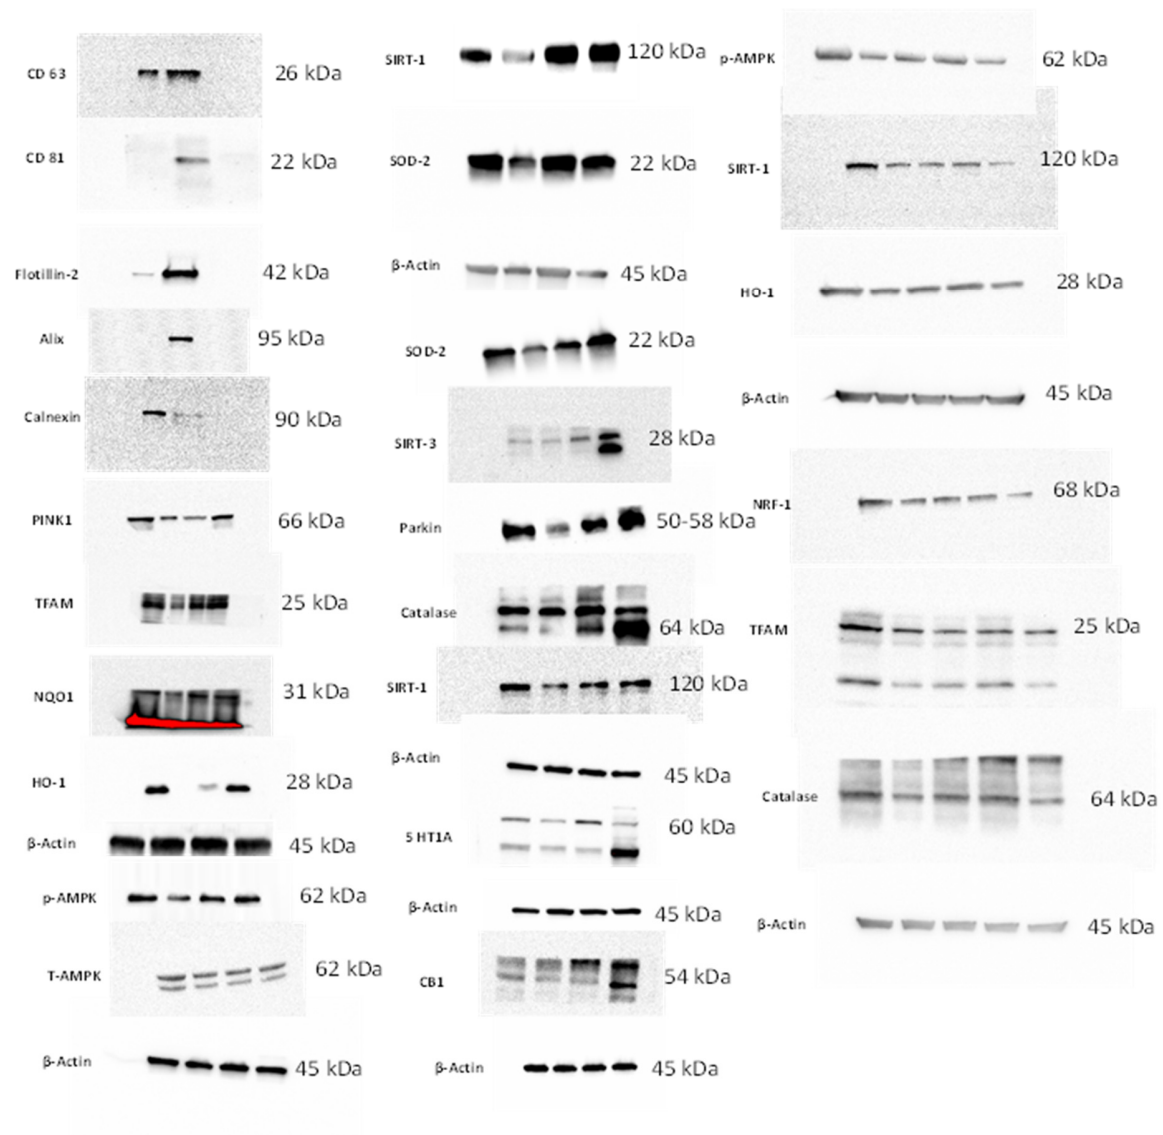

Supplement: s1 [file s1]
